# Supplementary material for: Positive end expiratory pressure in acute hypoxemic respiratory failure due to community acquired pneumonia: do we need a personalized approach?
Source: PeerJ. 2018 Jan 30;6:e4211. doi: 10.7717/peerj.4211 (PMC5796278; doi:10.7717/peerj.4211)
Supplement: Supplemental Information 1 [file peerj-06-4211-s001.xlsx]

## Sheet: Sheet1
ID	Age	Gender	Weight (kg)	Height (cm)	Admission date	Discharge date	Hospital stay (days)	DNR	DNI	Coronary artery disease	Valvulopaties	Hypertensive cardiopathy	Chronic heart failure	Arterial hypertension	Arhytmias	COPD	hypercapnic COPD	Smoking status	Smoking status (Y/N)	Emphysema	Lung transplant	ILD	Neuromuscolar disease	LTOT	Chronic renal failure	Dyalisis	Liver disease	Hepatic cirrhosis	Stroke	Dementia	BMI	DMII	Autoimmune disease	Solid malignancy	Hematologic malignancy	HIV_pos	AIDS	Asplenia	Alcholism	Immunodeficiency	Nursing-home resident	Recent hospitalization	HCAP_o_CAP	HAP	Ab-ingestis pneumonia	Left superior lobe	Lingular lobe	Left inferior lobe	Right superior lobe
1	65	1	-1	-1	2011-10-22	2011-11-09	18	0	0	0	0	0	0	0	0	0	0	0	0	0	0	0	0	0	0	0	0	0	0	0	#NULL!	0	0	0	0	0	0	0	0	0	0	0	1	0	0	0	0	1	0
2	42	2	78	175	2011-12-02	2011-12-16	14	0	0	0	0	0	0	0	0	0	0	2	1	0	0	0	0	0	0	0	0	0	0	0	26	0	0	0	0	0	0	0	0	0	0	0	1	0	0	0	0	1	0
3	87	2	78	170	2011-12-30	2012-01-16	17	1	1	0	0	0	0	0	0	1	0	2	1	0	0	0	0	0	0	0	0	0	1	0	26	0	0	0	0	0	0	0	0	0	0	1	1	0	0	0	0	0	1
4	61	1	65	170	2012-03-03	2012-03-20	17	0	0	0	0	1	0	1	0	1	0	1	1	1	0	0	0	0	0	0	0	0	0	0	22	0	0	0	0	0	0	0	0	0	0	0	1	0	0	0	0	0	1
5	71	2	-1	-1	2012-07-20	2012-08-14	25	0	0	1	0	0	0	0	1	0	0	2	1	0	0	0	0	0	0	0	0	0	0	0	#NULL!	0	0	0	0	0	0	0	0	0	0	0	1	0	0	0	0	0	0
6	79	2	-1	-1	2012-08-09	2012-09-04	26	1	1	1	0	0	0	0	0	1	0	2	1	0	0	0	0	1	1	0	0	0	0	0	#NULL!	0	0	0	0	0	0	0	0	0	0	0	1	0	0	1	0	0	1
7	79	2	70	169	2012-09-22	2012-10-12	20	0	0	0	1	0	0	0	0	0	0	0	0	0	0	0	0	0	0	0	0	0	0	0	24	0	0	0	0	0	0	0	0	0	0	0	1	0	0	0	0	0	0
8	56	2	88	182	2012-11-24	2012-12-20	26	0	0	0	0	0	0	0	1	1	0	2	1	0	0	0	0	0	0	0	1	1	0	0	26	0	0	0	0	0	0	0	1	0	0	0	1	0	0	0	0	0	1
9	90	2	55	167	2012-12-27	2013-01-16	20	1	1	0	0	0	0	0	1	1	0	2	1	0	0	0	0	0	0	0	0	0	0	0	19	0	0	0	#NULL!	0	0	0	0	0	1	1	1	0	0	0	0	0	1
10	40	1	48	163	2013-01-11	2013-02-01	21	0	0	0	0	0	0	0	0	0	0	0	0	0	0	0	0	0	0	0	0	0	1	0	18	0	0	0	0	0	0	0	0	0	0	0	1	0	0	0	0	0	1
11	66	2	76	172	2013-01-18	2013-02-05	18	0	0	0	0	0	0	0	0	1	0	2	1	1	0	0	0	0	0	0	1	0	0	0	25	0	0	0	1	0	0	0	0	0	0	0	1	0	0	0	0	1	0
12	80	2	80	173	2013-02-13	2013-03-05	20	0	0	1	0	1	0	1	1	0	0	2	1	0	0	0	0	0	0	0	0	0	0	0	26	0	0	0	0	0	0	0	0	0	0	0	1	0	0	0	0	0	0
15	35	2	85	183	2013-07-15	2013-07-31	16	0	0	0	0	0	0	0	0	0	0	0	0	0	0	0	0	0	0	0	0	0	0	0	25	1	1	0	0	0	0	0	0	1	0	0	1	0	0	1	0	0	0
16	63	2	83	168	2013-08-18	2013-08-28	10	0	0	0	0	0	0	1	0	0	0	2	1	0	0	0	0	0	0	0	0	0	0	0	29	0	0	0	0	0	0	0	0	0	0	0	1	0	0	0	0	0	1
17	66	1	70	156	2013-08-20	2013-09-01	12	0	0	0	0	0	0	1	0	0	0	0	0	0	0	0	0	0	0	0	0	0	0	0	28	0	0	0	1	0	0	0	0	0	0	0	1	0	0	0	0	0	0
18	74	1	85	160	2013-08-26	2013-09-03	8	0	0	1	0	0	0	0	1	0	0	2	1	0	0	0	0	0	0	0	0	0	0	0	33	1	0	0	0	0	0	0	0	0	0	0	1	0	0	0	0	1	0
19	83	1	60	158	2013-09-03	2013-09-12	9	0	0	0	0	1	0	1	0	0	0	0	0	0	0	0	0	0	0	0	0	0	0	0	24	1	0	0	0	0	0	0	0	0	0	0	1	0	0	0	0	1	0
20	78	2	70	170	2013-10-26	2013-11-08	13	0	0	0	0	1	0	1	0	0	0	2	1	0	0	0	0	0	0	0	0	0	0	0	24	0	0	0	0	0	0	0	0	0	0	0	1	0	0	0	0	0	1
21	79	2	90	180	2014-01-28	2014-02-07	10	0	0	0	0	0	0	1	0	1	0	2	1	0	0	0	0	1	0	0	0	0	0	0	27	1	0	0	0	0	0	0	0	0	0	0	1	0	0	0	0	0	0
22	73	1	59	150	2014-02-24	2014-03-10	14	0	0	0	0	1	0	1	0	0	0	2	1	0	0	0	0	0	0	0	1	0	0	0	26	1	0	0	0	0	0	0	0	0	0	0	1	0	0	0	0	0	0
23	67	2	74	172	2014-03-04	2014-03-17	13	0	0	0	0	0	0	0	0	1	0	2	1	1	0	0	0	0	0	0	1	0	0	0	25	0	0	0	1	0	0	0	0	0	0	0	1	0	0	0	0	1	0
24	80	1	53	157	2014-07-07	2014-08-07	31	1	1	0	0	0	0	1	0	0	0	2	1	0	0	0	0	0	0	0	0	0	0	0	21	0	0	0	0	0	0	0	0	0	0	0	1	0	0	1	0	0	1
25	54	2	75	176	2015-04-26	2015-05-05	9	0	0	0	0	0	0	1	0	0	0	0	0	0	0	0	0	0	0	0	0	0	0	0	24	0	0	0	0	0	0	0	0	0	0	0	1	0	0	0	0	1	0
26	38	2	105	183	2015-03-21	2015-03-27	6	0	0	0	0	0	0	1	0	0	0	1	1	0	0	0	0	0	0	0	0	0	0	0	31	0	0	0	0	0	0	0	0	0	0	0	1	0	0	0	0	1	0
27	42	2	90	190	2015-03-12	2015-03-25	13	0	0	0	0	0	0	0	0	0	0	0	0	0	0	0	0	0	0	0	0	0	0	0	25	0	0	0	1	0	0	0	0	1	0	0	1	0	0	0	0	0	0
28	81	1	60	160	2015-06-24	2015-07-03	9	0	0	0	0	1	0	1	0	0	0	0	0	0	0	0	0	0	0	0	0	0	0	0	23	0	0	0	0	0	0	0	0	0	0	0	1	0	0	0	0	0	1
30	78	2	-1	-1	2013-09-13	2013-09-18	5	1	1	0	0	0	0	0	1	0	0	0	0	0	0	0	0	0	1	0	1	0	0	0	-1	0	0	1	0	0	0	0	0	0	0	1	1	0	0	0	0	1	0
31	68	1	60	158	2015-11-20	2015-12-04	14	0	0	0	0	0	0	1	0	0	0	0	0	0	0	0	0	0	0	0	0	0	0	0	24	0	0	0	1	0	0	0	0	1	0	0	1	0	0	1	1	1	1
32	45	2	161	183	2015-12-29	2016-01-07	8	0	0	0	0	0	0	0	0	0	0	2	1	0	0	0	0	0	0	0	0	0	0	0	48	0	0	0	0	0	0	0	0	0	0	0	1	0	0	1	1	1	0
33	77	1	51	161	2016-01-02	2016-01-11	9	0	0	0	0	1	0	1	1	0	0	0	0	0	0	0	0	0	0	0	0	0	0	1	20	0	0	0	0	0	0	0	1	0	0	0	1	0	0	1	0	0	1
34	68	2	69	169	2016-01-13	2016-01-29	15	0	0	0	0	0	0	0	0	1	0	2	1	1	0	0	0	1	0	0	1	0	0	0	24	0	0	0	1	0	0	0	0	0	0	0	1	0	0	0	0	1	0
35	56	2	90	193	2016-02-18	2016-03-07	18	0	0	0	0	1	0	0	1	0	0	2	1	0	0	0	0	0	0	0	0	0	0	0	30	0	0	0	0	0	0	0	0	0	0	0	1	0	0	0	0	1	1
36	80	1	-1	-1	2016-04-11	2016-05-08	27	0	0	0	0	0	0	1	0	0	0	0	0	0	0	0	0	0	0	0	0	0	0	0	-1	1	0	0	0	0	0	0	0	0	0	0	1	0	0	0	0	1	0
37	77	2	78	165	2016-06-04	2016-06-27	22	0	0	0	0	1	0	0	0	0	0	1	1	0	0	0	0	0	1	0	0	0	0	0	29	0	1	1	0	0	0	0	0	0	0	0	1	0	0	0	0	0	0
38	88	2	57	165	2016-01-27	2016-02-19	23	1	1	0	0	1	0	1	0	1	0	2	1	1	0	0	0	0	0	0	0	0	0	0	20	0	0	0	0	0	0	0	0	0	0	0	1	0	0	0	0	0	1
39	42	2	85	175	2017-03-02	2017-03-15	13	0	0	0	0	0	0	0	0	0	0	1	1	0	0	0	0	0	0	0	0	0	0	0	27.75	0	0	0	0	0	0	0	0	0	0	0	1	0	0	0	0	1	0
40	75	2	92	171	2017-09-30	2017-10-14	14	0	0	1	0	0	0	1	0	0	0	2	1	0	0	0	0	0	0	0	0	0	0	0	31.46	1	1	0	1	0	0	0	0	1	0	0	1	0	0	0	0	0	0
42	79	2	90	179	2016-07-20	2016-08-01	12	0	0	0	0	1	0	1	0	0	0	0	0	0	0	0	0	0	0	0	0	0	0	0	28.09	0	0	0	0	0	0	0	0	0	0	0	1	0	0	1	0	0	0
44	80	2	181	67	2017-01-31	2017-02-17	17	1	1	0	1	0	1	0	1	1	0	2	1	1	0	0	0	1	0	0	0	0	0	0	20.45	0	0	0	0	0	0	0	0	0	0	1	1	0	0	0	0	0	0
45	80	2	178	60	2016-09-07	2016-09-15	8	1	1	0	0	0	1	0	1	1	0	2	1	-1	0	0	0	0	0	0	0	0	0	0	18.94	0	0	0	0	0	0	0	0	0	0	0	1	0	0	1	0	1	0
46	76	2	168	64	2016-11-17	2016-12-19	31	0	0	1	0	0	0	0	0	0	0	2	1	0	0	0	0	0	0	0	0	0	0	0	22.68	0	0	0	0	0	0	0	1	0	0	0	1	0	0	1	1	1	1
[truncated: 147 more columns]
